# Supplementary material for: Dynamics of Content Knowledge: Learned from Indonesian Arabic Teachers
Source: Hindawi journal article supplement (doi:10.1155/2023/8883362), 2023-05-15

# Rasch Model for Dichotomous Items from Question Package 1

## Nahwu

### Item Statistics

|  | | **Proportion** | | **Measure** | | **S.E.Measure** | | **Infit** | |
| --- | --- | --- | --- | --- | --- | --- | --- | --- | --- |
| N1 |  | 0.392 |  | 0.4930 |  | 0.304 |  | 1.045 |  |
| N2 |  | 0.510 |  | -0.0464 |  | 0.298 |  | 1.011 |  |
| N4 |  | 0.471 |  | 0.1311 |  | 0.298 |  | 1.016 |  |
| N5 |  | 0.549 |  | -0.2244 |  | 0.299 |  | 0.997 |  |
| N6 |  | 0.529 |  | -0.1353 |  | 0.298 |  | 1.026 |  |
| N7 |  | 0.412 |  | 0.4010 |  | 0.302 |  | 0.918 |  |
| N8 |  | 0.333 |  | 0.7795 |  | 0.314 |  | 1.101 |  |
| N10 |  | 0.392 |  | 0.4930 |  | 0.304 |  | 1.004 |  |
| N18 |  | 0.431 |  | 0.3102 |  | 0.300 |  | 1.048 |  |
| N22 |  | 0.471 |  | 0.1311 |  | 0.298 |  | 1.050 |  |
| N23 |  | 0.314 |  | 0.8797 |  | 0.319 |  | 0.981 |  |
| N24 |  | 0.333 |  | 0.7795 |  | 0.314 |  | 1.048 |  |
| N25 |  | 0.412 |  | 0.4010 |  | 0.302 |  | 1.019 |  |
| N27 |  | 0.510 |  | -0.0464 |  | 0.298 |  | 0.929 |  |
| N29 |  | 0.451 |  | 0.2203 |  | 0.299 |  | 0.960 |  |
| N30 |  | 0.451 |  | 0.2203 |  | 0.299 |  | 0.910 |  |
| N31 |  | 0.412 |  | 0.4010 |  | 0.302 |  | 0.990 |  |
| N32 |  | 0.392 |  | 0.4930 |  | 0.304 |  | 0.949 |  |
| Note. Infit= Information-weighted mean square statistic; Outfit= Outlier-sensitive means square statistic. | | | | | | | | | |
|  | | | | | | | | | |

### Wright Map


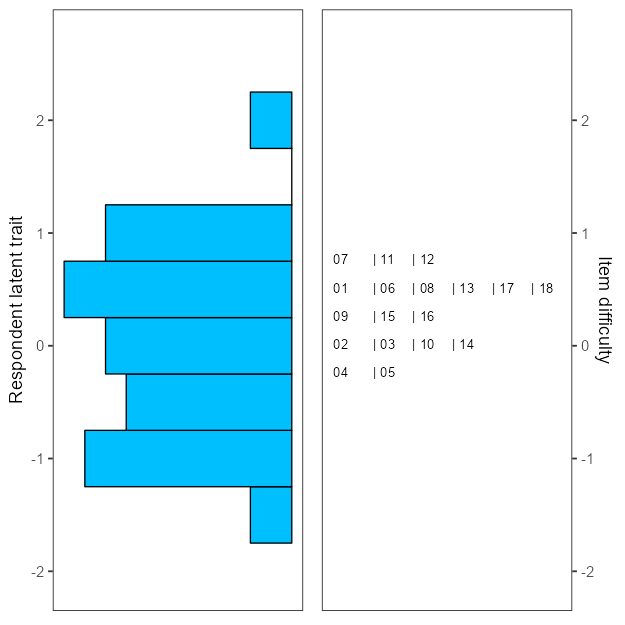


### Item Infit plot


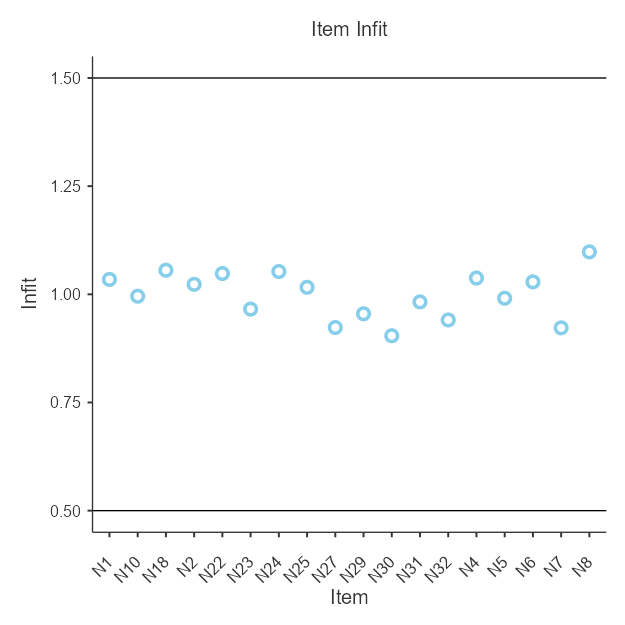


## Shorof

### Item Statistics

|  | | **Proportion** | | **Measure** | | **S.E.Measure** | | **Infit** | |
| --- | --- | --- | --- | --- | --- | --- | --- | --- | --- |
| S2 |  | 0.353 |  | 0.6992 |  | 0.314 |  | 1.031 |  |
| S5 |  | 0.490 |  | 0.0450 |  | 0.301 |  | 0.995 |  |
| S6 |  | 0.471 |  | 0.1359 |  | 0.302 |  | 1.053 |  |
| S7 |  | 0.314 |  | 0.9015 |  | 0.323 |  | 0.992 |  |
| S8 |  | 0.451 |  | 0.2272 |  | 0.303 |  | 0.955 |  |
| S9 |  | 0.451 |  | 0.2272 |  | 0.303 |  | 0.987 |  |
| S10 |  | 0.412 |  | 0.4120 |  | 0.306 |  | 0.991 |  |
| Note. Infit= Information-weighted mean square statistic; Outfit= Outlier-sensitive means square statistic. | | | | | | | | | |
|  | | | | | | | | | |

### Wright Map


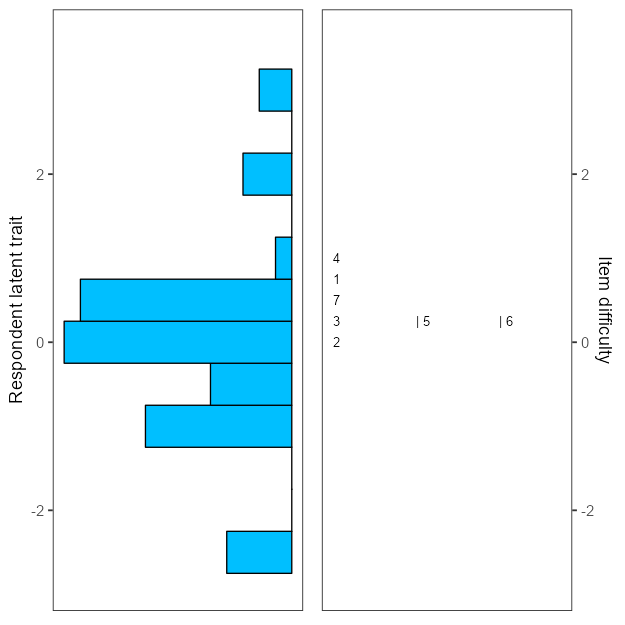


### Item Infit plot


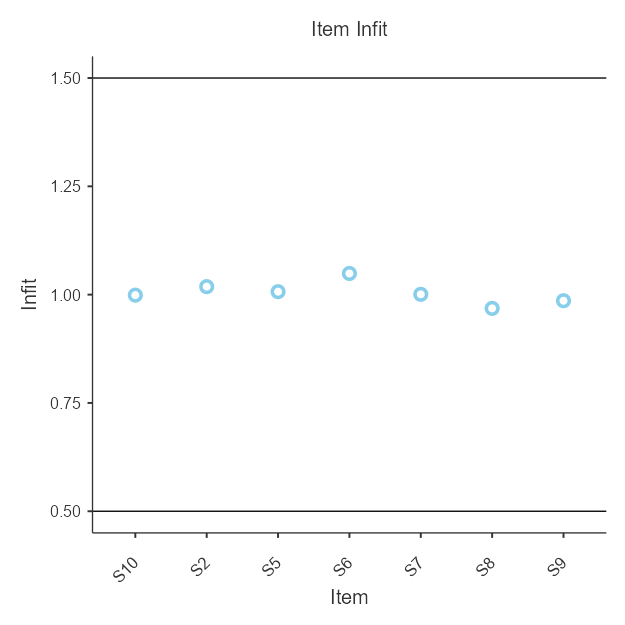


## Balaghah

### Item Statistics

|  | | **Proportion** | | **Measure** | | **S.E.Measure** | | **Infit** | |
| --- | --- | --- | --- | --- | --- | --- | --- | --- | --- |
| B4 |  | 0.549 |  | -0.248 |  | 0.310 |  | 0.880 |  |
| B12 |  | 0.471 |  | 0.134 |  | 0.309 |  | 0.995 |  |
| B17 |  | 0.451 |  | 0.229 |  | 0.310 |  | 0.937 |  |
| B19 |  | 0.412 |  | 0.424 |  | 0.313 |  | 1.033 |  |
| B20 |  | 0.529 |  | -0.152 |  | 0.309 |  | 0.996 |  |
| B24 |  | 0.275 |  | 1.166 |  | 0.343 |  | 0.970 |  |
| B25 |  | 0.373 |  | 0.623 |  | 0.319 |  | 1.004 |  |
| B27 |  | 0.392 |  | 0.523 |  | 0.316 |  | 1.027 |  |
| B28 |  | 0.471 |  | 0.134 |  | 0.309 |  | 1.031 |  |
| B30 |  | 0.392 |  | 0.523 |  | 0.316 |  | 1.087 |  |
| B31 |  | 0.392 |  | 0.523 |  | 0.316 |  | 1.043 |  |
| B36 |  | 0.412 |  | 0.424 |  | 0.313 |  | 0.943 |  |
| B37 |  | 0.471 |  | 0.134 |  | 0.309 |  | 1.061 |  |
| Note. Infit= Information-weighted mean square statistic; Outfit= Outlier-sensitive means square statistic. | | | | | | | | | |
|  | | | | | | | | | |

### Wright Map


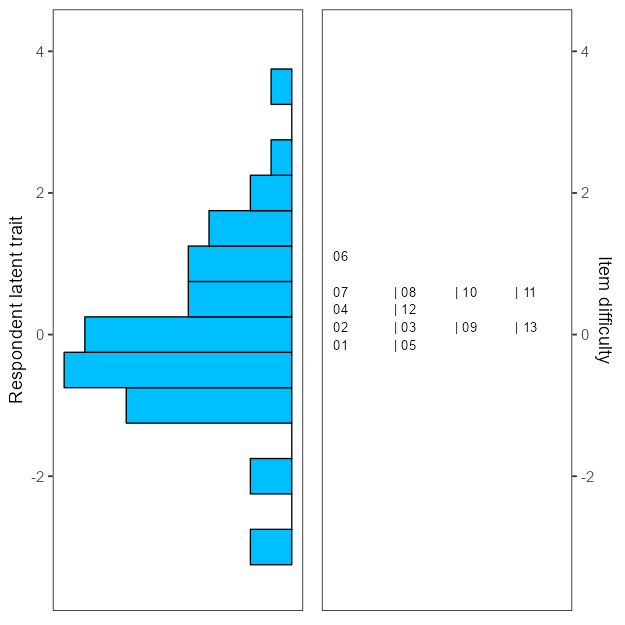


### Item Infit plot


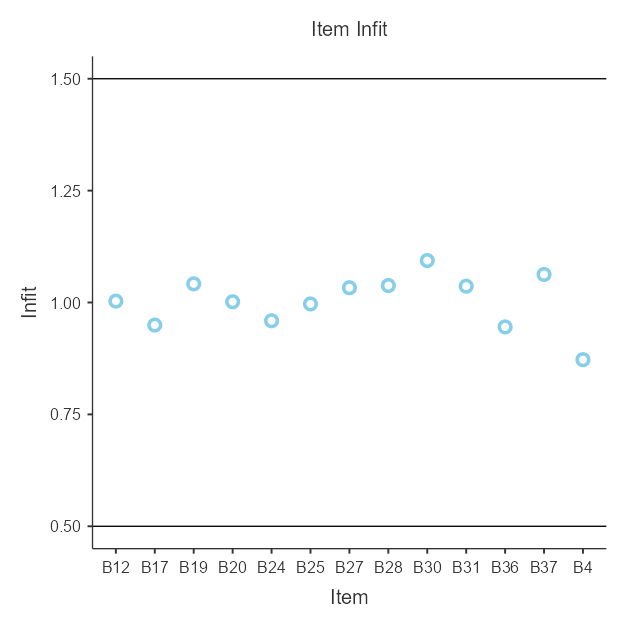


## Mu’jamiyah

### Item Statistics

|  | | **Proportion** | | **Measure** | | **S.E.Measure** | | **Infit** | |
| --- | --- | --- | --- | --- | --- | --- | --- | --- | --- |
| M4 |  | 0.431 |  | 0.3255 |  | 0.308 |  | 0.987 |  |
| M7 |  | 0.490 |  | 0.0436 |  | 0.306 |  | 0.984 |  |
| M9 |  | 0.333 |  | 0.8193 |  | 0.323 |  | 1.021 |  |
| M6 |  | 0.510 |  | -0.0497 |  | 0.305 |  | 1.065 |  |
| M12 |  | 0.353 |  | 0.7166 |  | 0.319 |  | 1.010 |  |
| M15 |  | 0.353 |  | 0.7166 |  | 0.319 |  | 0.962 |  |
| M17 |  | 0.529 |  | -0.1431 |  | 0.306 |  | 1.043 |  |
| M18 |  | 0.392 |  | 0.5179 |  | 0.312 |  | 1.047 |  |
| M19 |  | 0.255 |  | 1.2639 |  | 0.347 |  | 0.981 |  |
| M20 |  | 0.392 |  | 0.5179 |  | 0.312 |  | 0.999 |  |
| M21 |  | 0.216 |  | 1.5167 |  | 0.365 |  | 0.921 |  |
| Note. Infit= Information-weighted mean square statistic; Outfit= Outlier-sensitive means square statistic. | | | | | | | | | |
|  | | | | | | | | | |

### Wright Map


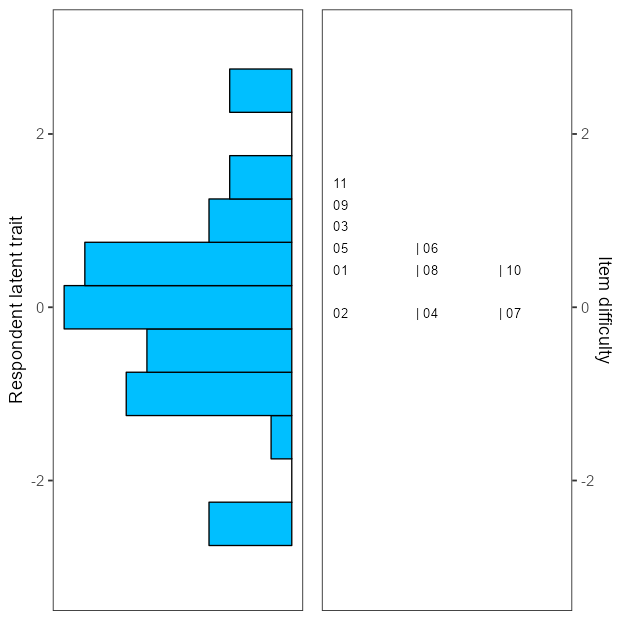


### Item Infit plot


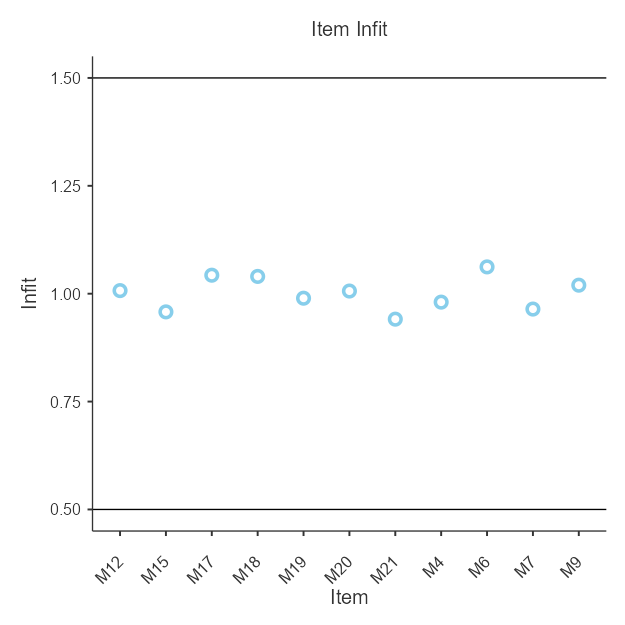


# Rasch Model for Dichotomous Items from Question Package 2

## Nahwu

### Item Statistics

|  | | **Proportion** | | **Measure** | | **S.E.Measure** | | **Infit** | |
| --- | --- | --- | --- | --- | --- | --- | --- | --- | --- |
| N2 |  | 0.660 |  | -0.8220 |  | 0.344 |  | 1.021 |  |
| N10 |  | 0.681 |  | -0.9418 |  | 0.349 |  | 1.026 |  |
| N11 |  | 0.596 |  | -0.4798 |  | 0.333 |  | 0.880 |  |
| N13 |  | 0.638 |  | -0.7055 |  | 0.339 |  | 0.998 |  |
| N12 |  | 0.489 |  | 0.0610 |  | 0.327 |  | 1.045 |  |
| Note. Infit= Information-weighted mean square statistic; Outfit= Outlier-sensitive means square statistic. | | | | | | | | | |
|  | | | | | | | | | |

### Wright Map


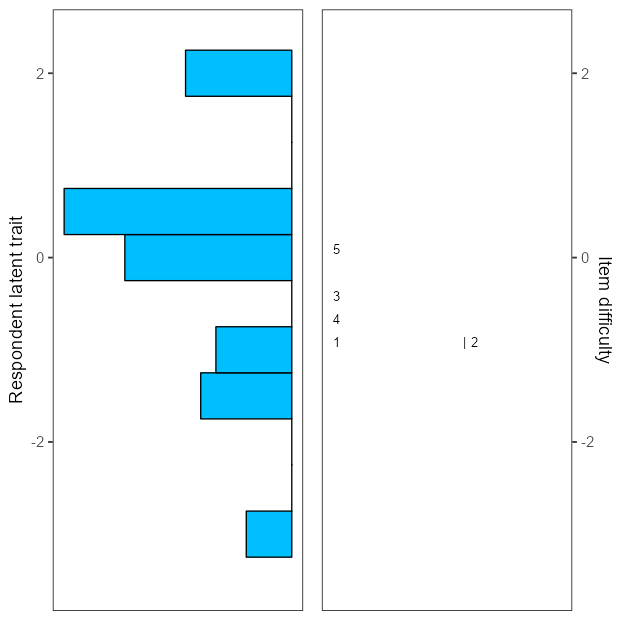


### Item Infit plot


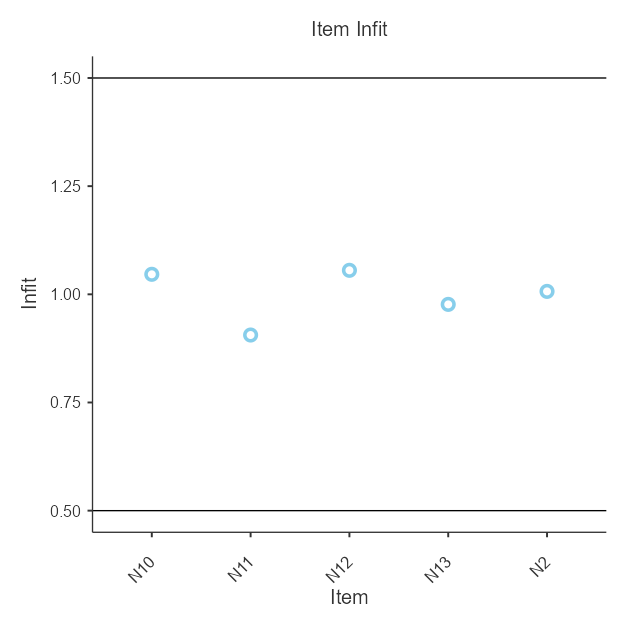


## Shorof

### Item Statistics

|  | | **Proportion** | | **Measure** | | **S.E.Measure** | | **Infit** | |
| --- | --- | --- | --- | --- | --- | --- | --- | --- | --- |
| S4 |  | 0.574 |  | -0.366 |  | 0.326 |  | 0.951 |  |
| S7 |  | 0.596 |  | -0.473 |  | 0.328 |  | 1.008 |  |
| S8 |  | 0.468 |  | 0.157 |  | 0.323 |  | 0.995 |  |
| S9 |  | 0.574 |  | -0.366 |  | 0.326 |  | 1.026 |  |
| S10 |  | 0.532 |  | -0.156 |  | 0.323 |  | 1.021 |  |
| Note. Infit= Information-weighted mean square statistic; Outfit= Outlier-sensitive means square statistic. | | | | | | | | | |
|  | | | | | | | | | |

### Wright Map


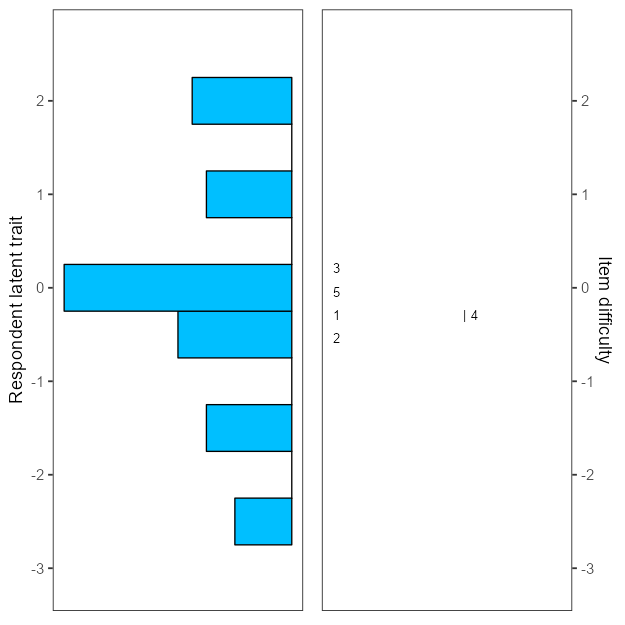


### Item Infit plot


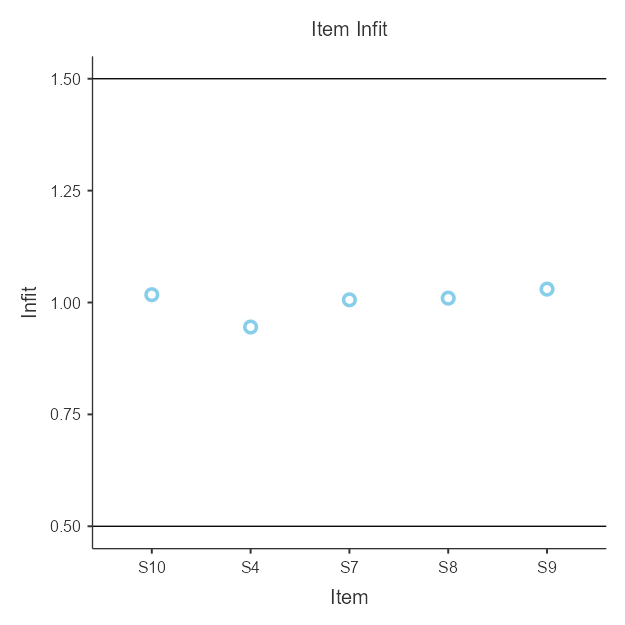


## Balaghah

### Item Statistics

|  | | **Proportion** | | **Measure** | | **S.E.Measure** | | **Infit** | |
| --- | --- | --- | --- | --- | --- | --- | --- | --- | --- |
| B2 |  | 0.638 |  | -0.6028 |  | 0.320 |  | 1.057 |  |
| B3 |  | 0.660 |  | -0.7068 |  | 0.325 |  | 1.015 |  |
| B4 |  | 0.489 |  | 0.0771 |  | 0.308 |  | 0.949 |  |
| B6 |  | 0.596 |  | -0.4020 |  | 0.314 |  | 1.062 |  |
| B8 |  | 0.660 |  | -0.7068 |  | 0.325 |  | 0.997 |  |
| B9 |  | 0.574 |  | -0.3043 |  | 0.311 |  | 0.840 |  |
| B10 |  | 0.489 |  | 0.0771 |  | 0.308 |  | 1.004 |  |
| B11 |  | 0.489 |  | 0.0771 |  | 0.308 |  | 1.052 |  |
| B12 |  | 0.553 |  | -0.2079 |  | 0.310 |  | 0.978 |  |
| B13 |  | 0.574 |  | -0.3043 |  | 0.311 |  | 0.980 |  |
| B15 |  | 0.553 |  | -0.2079 |  | 0.310 |  | 0.928 |  |
| B17 |  | 0.553 |  | -0.2079 |  | 0.310 |  | 1.010 |  |
| B19 |  | 0.574 |  | -0.3043 |  | 0.311 |  | 1.037 |  |
| B21 |  | 0.532 |  | -0.1124 |  | 0.308 |  | 1.013 |  |
| B22 |  | 0.702 |  | -0.9250 |  | 0.336 |  | 0.879 |  |
| B23 |  | 0.553 |  | -0.2079 |  | 0.310 |  | 1.048 |  |
| B25 |  | 0.660 |  | -0.7068 |  | 0.325 |  | 1.005 |  |
| B26 |  | 0.638 |  | -0.6028 |  | 0.320 |  | 1.064 |  |
| B27 |  | 0.532 |  | -0.1124 |  | 0.308 |  | 1.000 |  |
| B28 |  | 0.489 |  | 0.0771 |  | 0.308 |  | 0.984 |  |
| B30 |  | 0.553 |  | -0.2079 |  | 0.310 |  | 0.917 |  |
| B32 |  | 0.532 |  | -0.1124 |  | 0.308 |  | 1.053 |  |
| B33 |  | 0.660 |  | -0.7068 |  | 0.325 |  | 1.023 |  |
| B34 |  | 0.681 |  | -0.8140 |  | 0.330 |  | 1.019 |  |
| B35 |  | 0.638 |  | -0.6028 |  | 0.320 |  | 1.018 |  |
| B36 |  | 0.532 |  | -0.1124 |  | 0.308 |  | 0.961 |  |
| B37 |  | 0.596 |  | -0.4020 |  | 0.314 |  | 1.038 |  |
| B38 |  | 0.617 |  | -0.5013 |  | 0.317 |  | 1.001 |  |
| B40 |  | 0.596 |  | -0.4020 |  | 0.314 |  | 0.975 |  |
| B43 |  | 0.617 |  | -0.5013 |  | 0.317 |  | 1.028 |  |
| B45 |  | 0.596 |  | -0.4020 |  | 0.314 |  | 0.984 |  |
| B46 |  | 0.574 |  | -0.3043 |  | 0.311 |  | 1.042 |  |
| B47 |  | 0.532 |  | -0.1124 |  | 0.308 |  | 1.028 |  |
| B48 |  | 0.553 |  | -0.2079 |  | 0.310 |  | 0.983 |  |
| B49 |  | 0.532 |  | -0.1124 |  | 0.308 |  | 0.997 |  |
| B50 |  | 0.511 |  | -0.0175 |  | 0.308 |  | 0.964 |  |
| B51 |  | 0.574 |  | -0.3043 |  | 0.311 |  | 1.062 |  |
| B52 |  | 0.596 |  | -0.4020 |  | 0.314 |  | 0.947 |  |
| B53 |  | 0.447 |  | 0.2668 |  | 0.309 |  | 1.036 |  |
| B54 |  | 0.532 |  | -0.1124 |  | 0.308 |  | 1.070 |  |
| B55 |  | 0.638 |  | -0.6028 |  | 0.320 |  | 1.050 |  |
| B56 |  | 0.617 |  | -0.5013 |  | 0.317 |  | 0.955 |  |
| Note. Infit= Information-weighted mean square statistic; Outfit= Outlier-sensitive means square statistic. | | | | | | | | | |
|  | | | | | | | | | |

### Wright Map


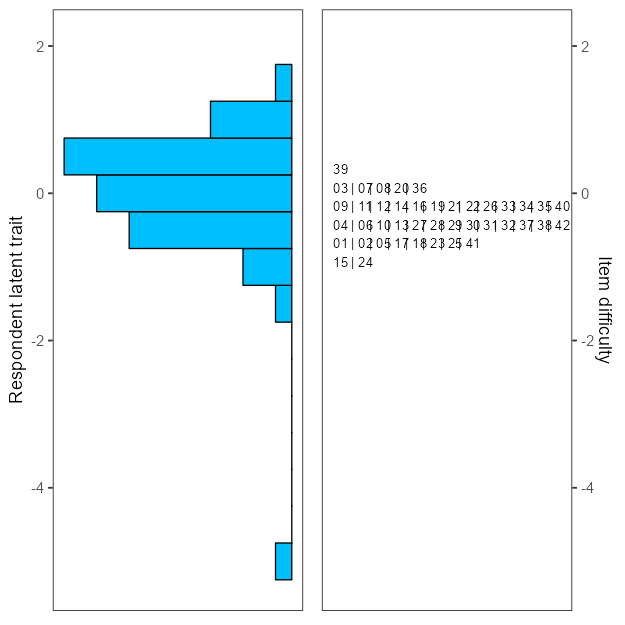


### Item Infit plot


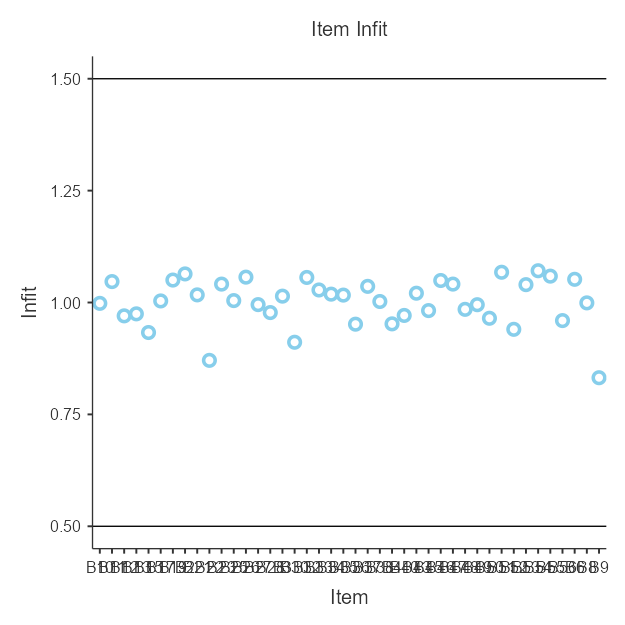


## Mu’jamiyah

### Item Statistics

|  | | **Proportion** | | **Measure** | | **S.E.Measure** | | **Infit** | |
| --- | --- | --- | --- | --- | --- | --- | --- | --- | --- |
| M4 |  | 0.617 |  | -0.5721 |  | 0.325 |  | 1.006 |  |
| M9 |  | 0.660 |  | -0.7883 |  | 0.333 |  | 1.011 |  |
| M11 |  | 0.489 |  | 0.0431 |  | 0.318 |  | 0.988 |  |
| M12 |  | 0.617 |  | -0.5721 |  | 0.325 |  | 0.885 |  |
| M14 |  | 0.574 |  | -0.3635 |  | 0.321 |  | 0.930 |  |
| M16 |  | 0.617 |  | -0.5721 |  | 0.325 |  | 1.116 |  |
| M19 |  | 0.553 |  | -0.2611 |  | 0.319 |  | 0.955 |  |
| M20 |  | 0.574 |  | -0.3635 |  | 0.321 |  | 1.039 |  |
| M22 |  | 0.574 |  | -0.3635 |  | 0.321 |  | 1.024 |  |
| M26 |  | 0.596 |  | -0.4671 |  | 0.323 |  | 1.053 |  |
| M28 |  | 0.638 |  | -0.6790 |  | 0.329 |  | 1.024 |  |
| Note. Infit= Information-weighted mean square statistic; Outfit= Outlier-sensitive means square statistic. | | | | | | | | | |
|  | | | | | | | | | |

**Wright Map**


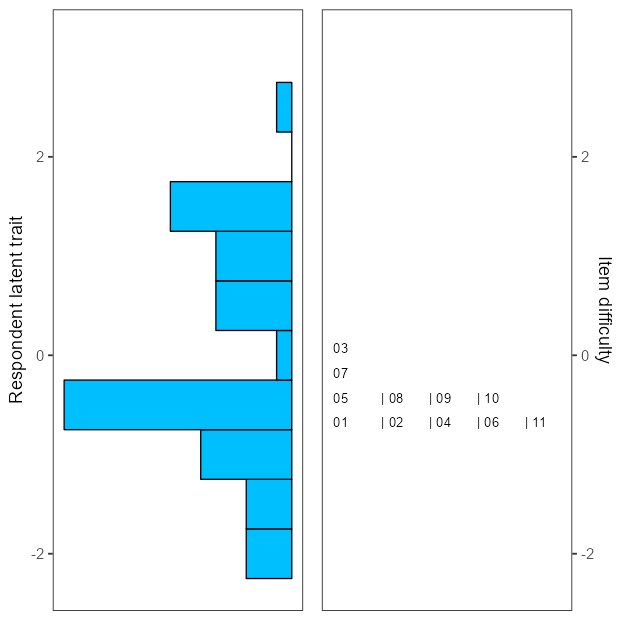


### Item Infit plot


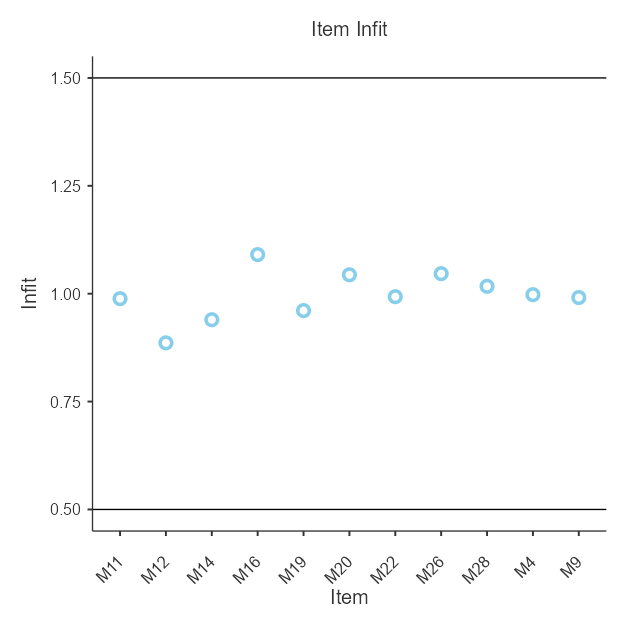

Supplement: f1 [file 8883362.f1.doc]
